# Supplementary material for: Improving O2 production of WO3 photoanodes with IrO2 in acidic aqueous electrolyte
Source: Royal Society of Chemistry journal article supplement (doi:10.1039/c3cp55527e), 2014-01-01
Supplement: c3cp55527e.pdf [file c3cp55527e.pdf]

# Improving O<sub>2</sub> Production of WO<sub>3</sub> Photoanodes with IrO<sub>2</sub> in Acidic Aqueous Electrolyte

Joshua M. Spurgeon\*, Jesus M. Velazquez, and Matthew T. McDowell

Joint Center for Artificial Photosynthesis  
California Institute of Technology  
Division of Chemistry and Chemical Engineering  
1200 E. California Blvd. m/c 132-80  
Pasadena, CA 91125 (USA)

## Supporting Information

### Electrode Illumination Schematic.

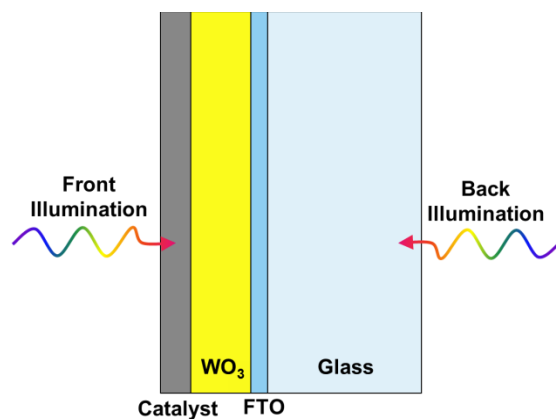

**Figure S1. Schematic for OER catalyst/WO<sub>3</sub>/FTO/glass photoanodes.** Under front illumination conditions, the light was passed through the catalyst layer before getting to the photoactive WO<sub>3</sub>. Under back illumination conditions, the light passed through the highly transparent glass substrate and FTO back contact before absorption in the WO<sub>3</sub> layer, without first passing through the catalyst.

# **IrO<sub>2</sub> on WO<sub>3</sub> Contact.**

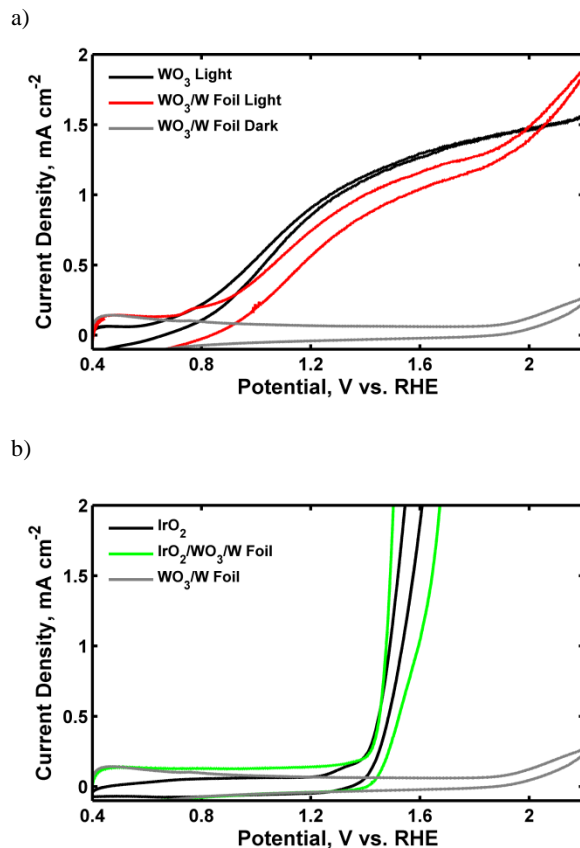

**Figure S2.  $J$ - $E$  behavior for WO<sub>3</sub> on W foil.** Photoelectrochemical current-density ( $J$ ) vs. potential ( $E$ ) behavior in 1 M H<sub>2</sub>SO<sub>4</sub> for (a) front-illuminated (black line) WO<sub>3</sub> on FTO, (red line) front-illuminated WO<sub>3</sub> on W foil, and (gray line) WO<sub>3</sub> on W foil in the dark. (b) Dark  $J$ - $E$  behavior for (black line) sputtered IrO<sub>2</sub> on FTO, (green line) sputtered IrO<sub>2</sub> on WO<sub>3</sub>/W foil, and (gray line) WO<sub>3</sub>/W foil.

To ensure that the electrocatalytic current observed on WO<sub>3</sub> photodiodes in reverse bias at  $> 1.4$  V vs. RHE was not due to a shunt caused by IrO<sub>2</sub> deposited directly in contact with the FTO substrate, WO<sub>3</sub> on W foil electrodes were fabricated. By annealing these electrodes in air at 400 °C for 2 hr, all exposed substrate at the bottom of the nanopores and cracks in the bulk WO<sub>3</sub> was oxidized to WO<sub>3</sub> as well. This was demonstrated by the lack of shunting in an electrolyte with a fast, one-electron redox couple (Fig. 1). During sputtering of IrO<sub>2</sub>, a mask was used to deposit the catalyst only on the WO<sub>3</sub> film to avoid any contact with the W foil or any edge effects. Nevertheless, as demonstrated in Figure S2b, sputtered IrO<sub>2</sub>/WO<sub>3</sub>/W foil electrodes displayed electrocatalytic current similar to IrO<sub>2</sub> by itself. The shunt therefore was interpreted to occur through the WO<sub>3</sub> layer.

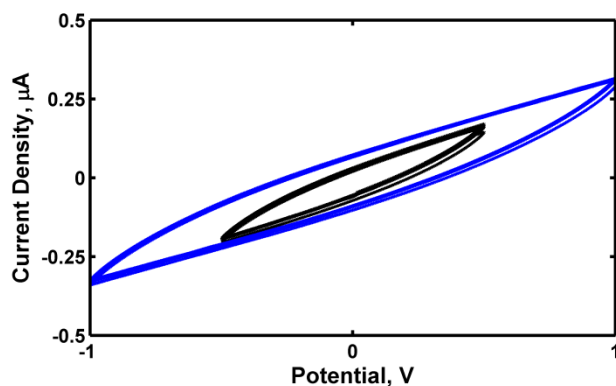

**Figure S3. Solid-state cyclic voltammogram for IrO<sub>2</sub> contacts on WO<sub>3</sub>.** Current vs. voltage (*I*-*V*) behavior for two-electrode CV sweeps at 100 mV s<sup>-1</sup> using sputtered IrO<sub>2</sub> contact pads 1 mm apart on WO<sub>3</sub> on glass (without FTO), scanning from (black lines) -0.5 to 0.5 V and from (blue lines) -1.0 to 1.0 V.

To verify the finding of ohmic behavior between the IrO<sub>2</sub> catalyst and WO<sub>3</sub> semiconductor, an attempt was made to directly investigate the nature of the contact with a solid-state measurement. WO<sub>3</sub> was deposited on a cleaned glass slide without an underlying transparent conductive layer, then two IrO<sub>2</sub> contact pads were deposited on the WO<sub>3</sub> by sputtering for 30 min using a mask to define square spots spaced 1 mm apart. A coiled Cu wire was attached to each IrO<sub>2</sub> spot with Ag paint, and these wires were used in two-electrode cyclic voltammograms at various scan rates and potentials. As shown in Figure S3, the resulting currents were low (in the μA range) due to the high resistance of the WO<sub>3</sub> layer. Hysteresis in the data was ascribed to capacitance in the WO<sub>3</sub> layer. Still, the overall trend across a 2 V range was quite linear, an indication of ohmic behavior.

### Co<sub>3</sub>O<sub>4</sub> and RuO<sub>2</sub> Catalyst Layers.

In addition to IrO<sub>2</sub>, the OECs Co<sub>3</sub>O<sub>4</sub> and RuO<sub>2</sub> were tested as drop-casted, sintered films and as sputtered films. Due to their instability in the 1 M H<sub>2</sub>SO<sub>4</sub> electrolyte used in this work, they were not explored further.

For the drop-cast, sintered catalyst electrodes, three different oxygen-evolving metal oxide catalysts (IrO<sub>2</sub>, RuO<sub>2</sub>, or Co<sub>3</sub>O<sub>4</sub>) were separately deposited onto thin WO<sub>3</sub> films by drop-casting solutions of metal salts and then sintering to achieve the oxide form. A micropipette was used to drop-cast 20  $\mu$ L of a 20 mM solution of the corresponding metal salt (IrCl<sub>3</sub>·3H<sub>2</sub>O from Fisher Scientific, RuCl<sub>3</sub>·xH<sub>2</sub>O from Alfa Aesar, or Co(NO<sub>3</sub>)<sub>2</sub>·6H<sub>2</sub>O from Alfa Aesar) in isopropanol on a  $\sim$ 1 cm<sup>2</sup> area of the WO<sub>3</sub>. These films were allowed to dry at room temperature for  $\sim$ 1 hr then sintered at 400  $^{\circ}$ C in air for 1 hr. Analogous electrodes of the OEC directly on FTO glass were produced by the same method.

For the sputtered catalyst electrodes, OEC films of IrO<sub>2</sub>, RuO<sub>2</sub>, or Co<sub>3</sub>O<sub>4</sub> were sputtered from metal targets of Ir, Ru, or Co (all  $\geq$  99.9% from AJA International), respectively. In each case, the catalyst layer was sputtered onto the WO<sub>3</sub> film from an RF source at 200 W at 300  $^{\circ}$ C under a constant flow of 3.0/3.0 sccm Ar/O<sub>2</sub> for IrO<sub>2</sub> and 4.5/0.5 sccm Ar/O<sub>2</sub> for RuO<sub>2</sub> and Co<sub>3</sub>O<sub>4</sub> while maintaining an overall pressure of 6 mtorr. Two different thicknesses of each catalyst were produced by sputtering for either 0.5 min ( $<$  10 nm) or 30 min ( $>$  100 nm). Analogous electrodes of the OEC directly on FTO glass were produced by the same method.

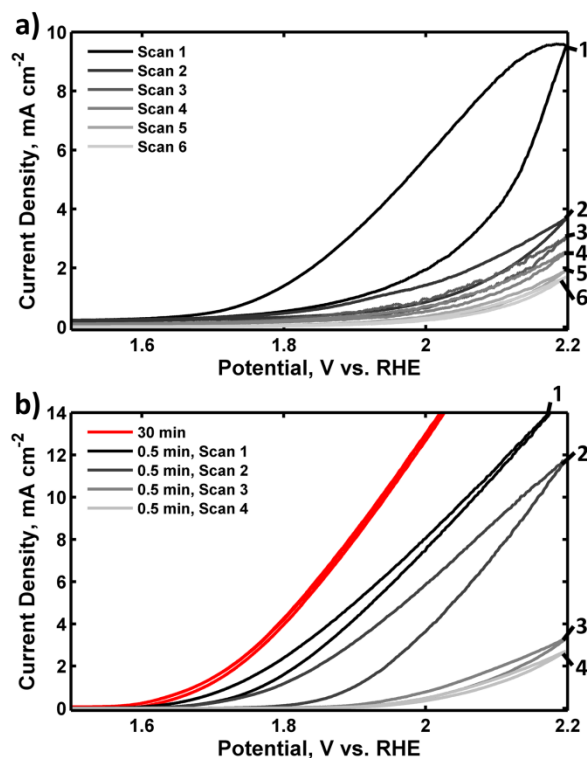

**Figure S4. Instability of Co<sub>3</sub>O<sub>4</sub> during cyclic voltammetry.** *J-E* behavior in 1 M H<sub>2</sub>SO<sub>4</sub> of (a) sintered Co<sub>3</sub>O<sub>4</sub> on WO<sub>3</sub> over 6 scans, and (b) sputtered Co<sub>3</sub>O<sub>4</sub> on FTO/glass over 4 scans. Thin, 0.5 min sputtered Co<sub>3</sub>O<sub>4</sub> decayed rapidly over 4 scans (black to gray lines). Although thick, 30 min sputtered Co<sub>3</sub>O<sub>4</sub> (red line) appeared stable over 4 scans, the current decayed away after extended use ( $>$  1 hr) in 1 M H<sub>2</sub>SO<sub>4</sub>.

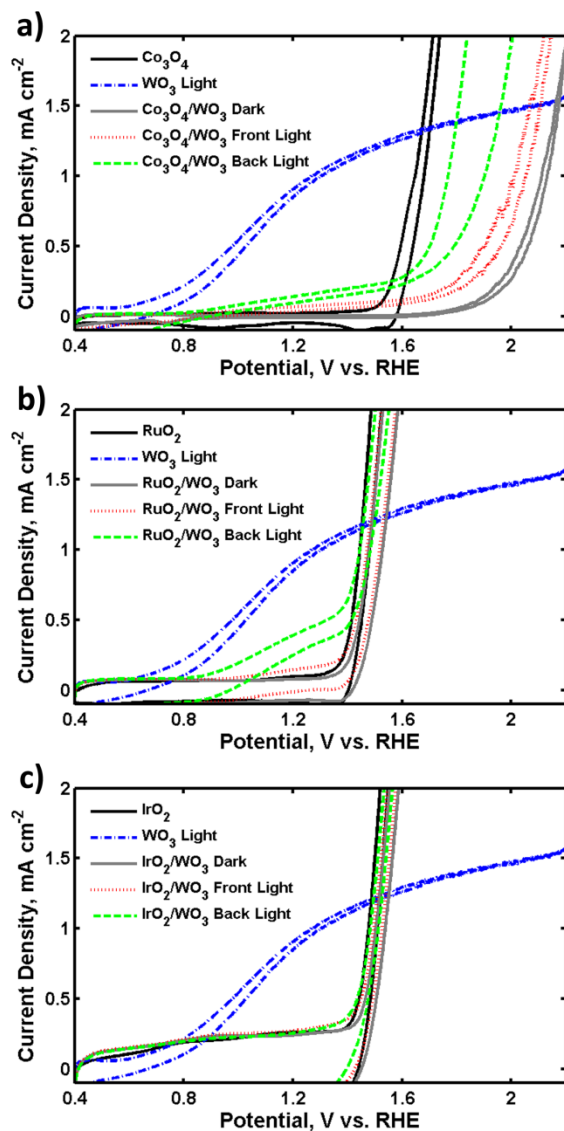

**Figure S5.**  $J$ - $E$  behavior for drop-cast, sintered OER catalysts on  $\text{WO}_3$ . Photoelectrochemical current-density ( $J$ ) vs. potential ( $E$ ) behavior in 1 M  $\text{H}_2\text{SO}_4$  for (a)  $\text{Co}_3\text{O}_4$ , (b)  $\text{RuO}_2$ , and (c)  $\text{IrO}_2$  sintered from drop-cast metal salt solutions on  $\text{WO}_3$  thin films and annealed in air at 400 °C for 1 hr. Performance is shown for (green lines) back illumination, (red lines) front illumination, and (gray lines) in the dark, with (blue lines) bare  $\text{WO}_3$  under illumination and (black lines) the catalyst by itself in the dark for reference.

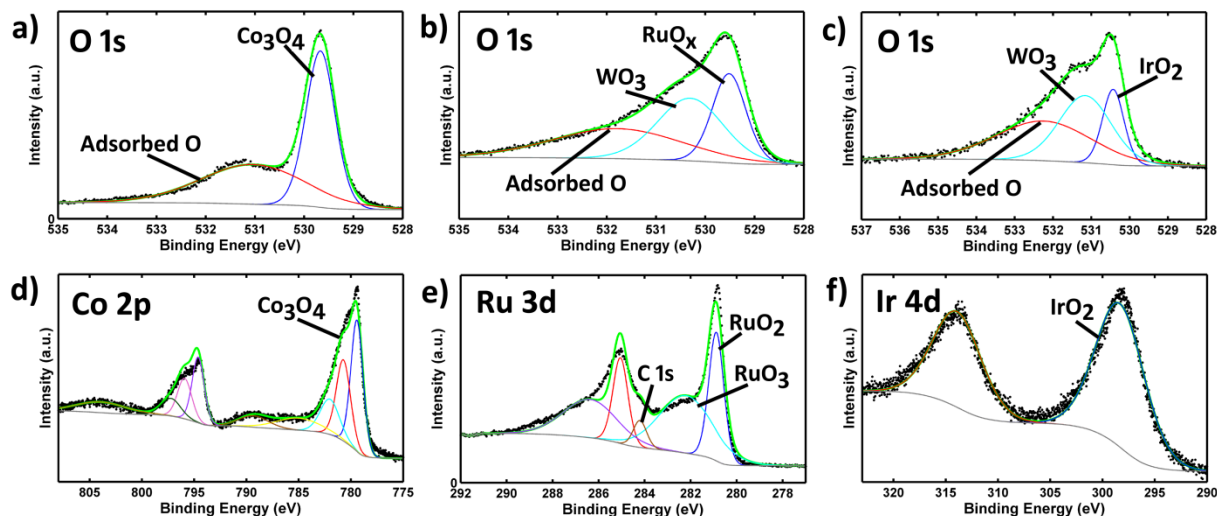

**Figure S6. XPS of sputtered OER catalyst films on WO<sub>3</sub> photoanodes.** High resolution scans for sputtered (a,d) Co<sub>3</sub>O<sub>4</sub>, (b,e) RuO<sub>2</sub>, and (c,f) IrO<sub>2</sub> on WO<sub>3</sub> thin films. The (a-c) O 1s, (d) Co 2p, (e) Ru 3d, and (f) Ir 4d regions are shown. The RuO<sub>2</sub> and IrO<sub>2</sub> films were sputtered for 0.5 min, but the Co<sub>3</sub>O<sub>4</sub> film was sputtered for 30 min to obtain a better Co 2p signal for clearer peak fitting.

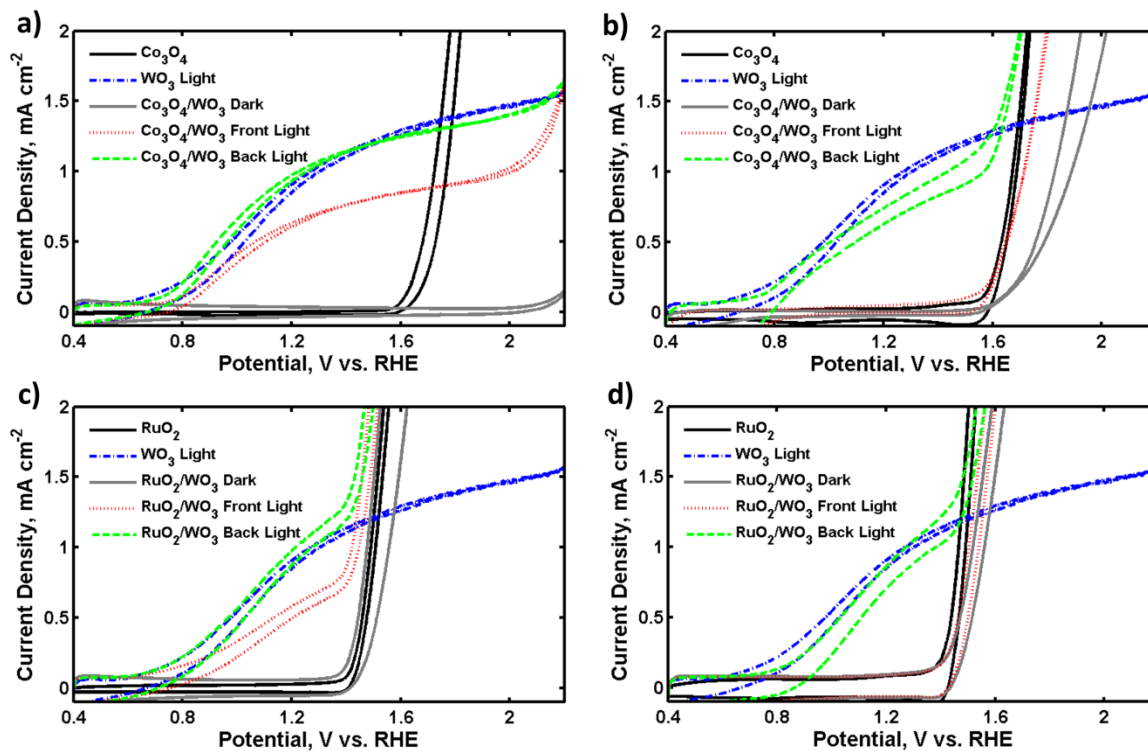

**Figure S7. *J-E* behavior for sputtered OER catalyst on WO<sub>3</sub>.** Photoelectrochemical current-density (*J*) vs. potential (*E*) behavior in 1 M H<sub>2</sub>SO<sub>4</sub> for (a,c) 0.5 min sputtered and (b,d) 30 min sputtered films of (a,b) Co<sub>3</sub>O<sub>4</sub>, and (c,d) RuO<sub>2</sub> on WO<sub>3</sub>. Performance is shown for (green lines) back illumination, (red lines) front illumination, and (gray lines) in the dark, with (blue lines) bare WO<sub>3</sub> under illumination and (black lines) the catalyst by itself in the dark for reference.

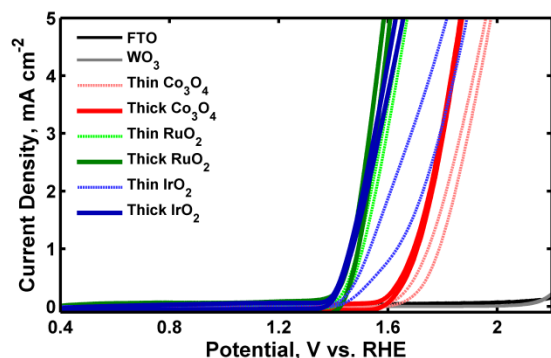

**Figure S8. Dark  $J$ - $E$  behavior for sputtered OER catalysts.** Dark electrochemical current-density ( $J$ ) vs. potential ( $E$ ) behavior in 1 M  $\text{H}_2\text{SO}_4$  for (black) FTO, (gray)  $\text{WO}_3$ , (light red, dashed) thin sputtered  $\text{Co}_3\text{O}_4$ , (dark red) thick sputtered  $\text{Co}_3\text{O}_4$ , (light green, dashed) thin sputtered  $\text{RuO}_2$ , (dark green) thick sputtered  $\text{RuO}_2$ , (light blue, dashed) thin sputtered  $\text{IrO}_2$ , and (dark blue) thick sputtered  $\text{IrO}_2$ .

#### Optical Transmittance for Sintered and Sputtered $\text{IrO}_2$ Layers.

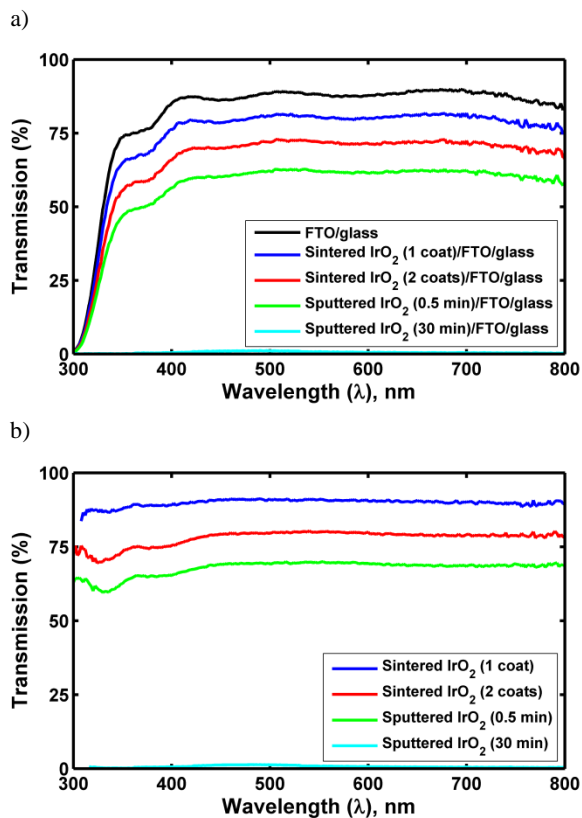

**Figure S9. Optical transmission of  $\text{IrO}_2$  catalyst layers.** The percent of light transmitted vs. wavelength for sintered and sputtered  $\text{IrO}_2$  layers on (a) FTO/glass substrates and (b) baseline-corrected for FTO/glass substrates to determine transmission only through the  $\text{IrO}_2$  layer.

Annealing Sputtered IrO<sub>2</sub>/WO<sub>3</sub> Photoanodes.

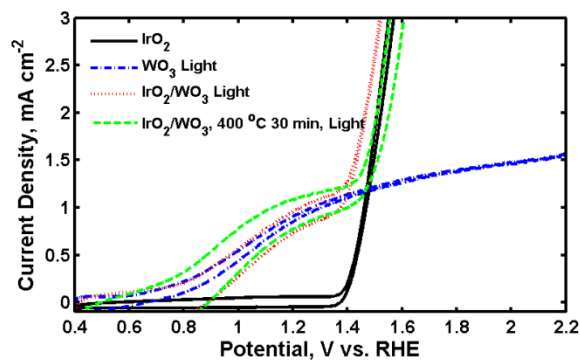

**Figure S10.** *J-E* behavior for annealed, sputtered IrO<sub>2</sub> on WO<sub>3</sub>. Photoelectrochemical current-density (*J*) vs. potential (*E*) behavior in 1 M H<sub>2</sub>SO<sub>4</sub>. Performance is shown for 30 min sputtered IrO<sub>2</sub>/WO<sub>3</sub> (red lines) as-deposited and (green lines) annealed under back illumination, with (blue lines) bare WO<sub>3</sub> under illumination and (black lines) the catalyst by itself in the dark for reference. Annealed samples were heated in air at 400 °C for 30 min.

IrO<sub>2</sub> Catalyst Layer Morphology.

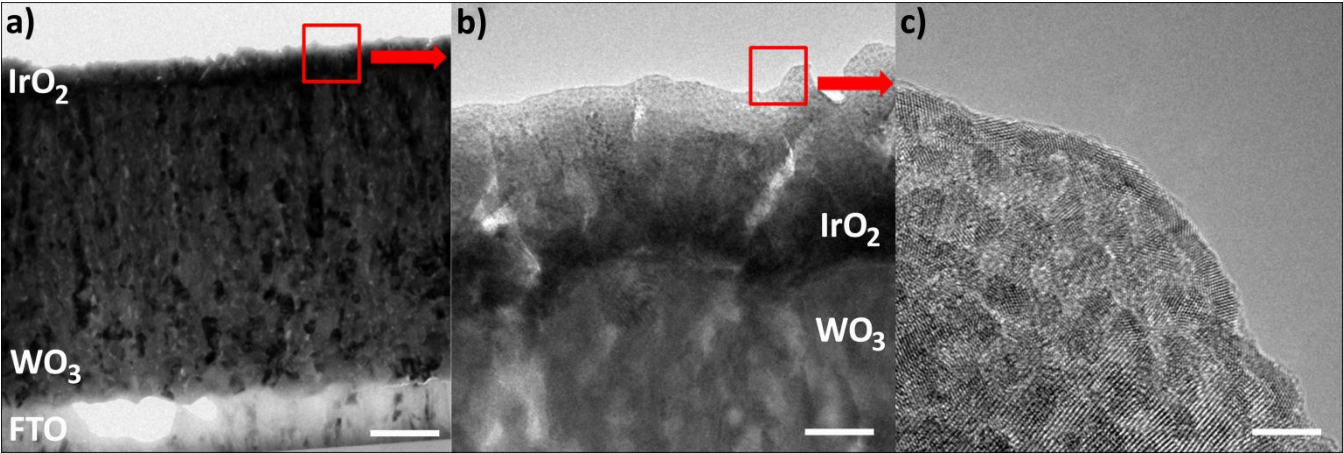

**Figure S11.** Morphology of sputtered IrO<sub>2</sub> layer. Cross-sectional TEM images for 30 min sputtered IrO<sub>2</sub> on WO<sub>3</sub> with a scale bar of (a) 200 nm, (b) 30 nm, and (c) 5 nm.

O<sub>2</sub> Production Measurements.

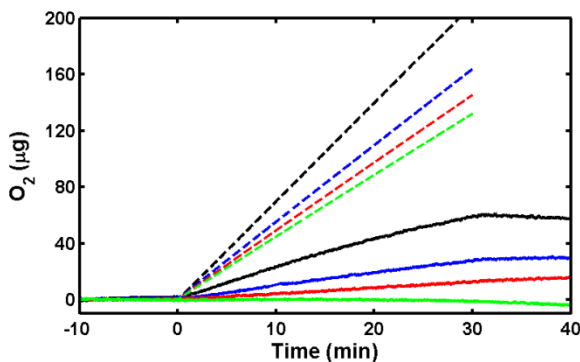

**Figure S12. O<sub>2</sub> production of a bare WO<sub>3</sub> photoanode.** The amount of O<sub>2</sub> produced by a bare, sputtered WO<sub>3</sub> film in 1 M H<sub>2</sub>SO<sub>4</sub> under illumination while biased at a given potential, as determined by (dashed lines) the total charge passed (assuming 100% faradaic conversion to O<sub>2</sub>) and by (solid lines) an optical O<sub>2</sub> sensor. The WO<sub>3</sub> photoanode was biased at potentials of (green lines) 1.4 V, (red lines) 1.5 V, (blue lines) 1.6 V, and (black lines) 2.0 V vs. RHE.

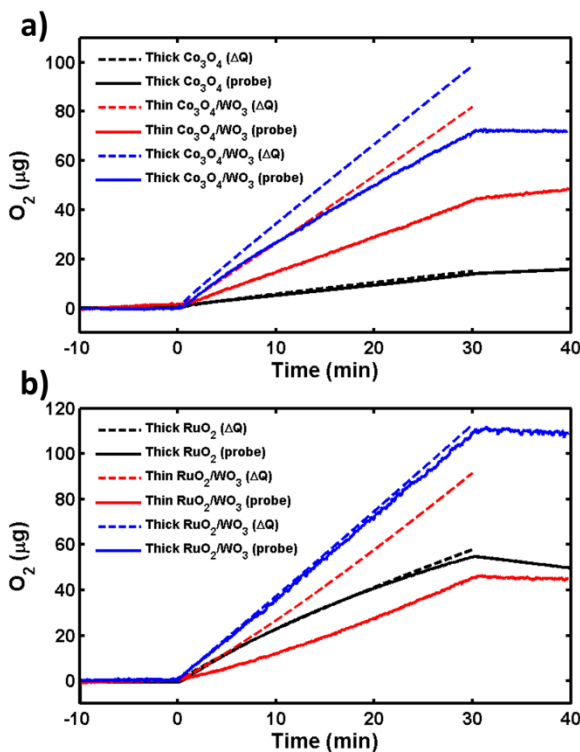

**Figure S13. O<sub>2</sub> production of sputtered OER catalysts on WO<sub>3</sub>.** The amount of O<sub>2</sub> produced at 1.2 V vs. RHE under back illumination in 1 M H<sub>2</sub>SO<sub>4</sub> for a WO<sub>3</sub> photoanode with a sputtered catalyst film of (a) Co<sub>3</sub>O<sub>4</sub>, and (b) RuO<sub>2</sub>. The quantity of O<sub>2</sub> was determined by (dashed lines) the total charge passed (assuming 100% faradaic conversion to O<sub>2</sub>) and by (solid lines) an optical O<sub>2</sub> sensor. For catalyst thicknesses, (red lines) a thin film was sputtered for 0.5 min, and (blue lines) a thick film was sputtered for 30 min. To demonstrate the high faradaic efficiency achievable with each catalyst, (black lines) bare catalyst films were measured in the dark at 1.5 V vs. RHE (RuO<sub>2</sub>) or 1.7 V vs. RHE (Co<sub>3</sub>O<sub>4</sub>).

# Electrode Stability.

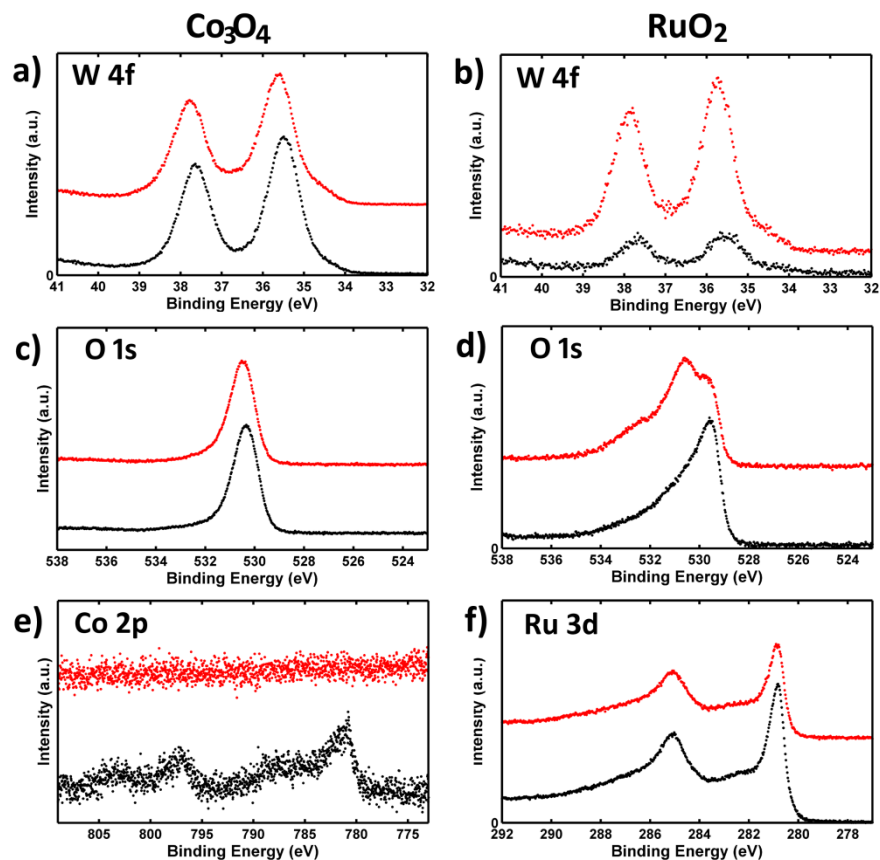

**Figure S14. XPS of sputtered OER catalysts on  $\text{WO}_3$ .** High resolution XPS spectra for  $\text{WO}_3$  films covered with (a, c, e)  $\text{Co}_3\text{O}_4$ , and (b, d, f)  $\text{RuO}_2$ , each sputtered for 0.5 min. The regions shown are (a,b) W 4f, (c,d) O 1s, (e) Co 2p, and (f) Ru 3d. The films were analyzed (black lines) as-deposited, and (red lines) after a  $J$ - $E$  behavior measurement under illumination in 1 M  $\text{H}_2\text{SO}_4$ .

Figure S14 shows the XPS spectra for thin, 0.5 min sputtered OEC/ $\text{WO}_3$  electrodes in which the catalyst layer was thin enough to allow sampling of the underlying  $\text{WO}_3$ . As expected from the decay in current observed during  $J$ - $E$  measurements (Fig. S4), the  $\text{Co}_3\text{O}_4$  Co 2p signal is completely gone after measurement in 1 M  $\text{H}_2\text{SO}_4$  (Fig. S14e). Although the catalytic current with  $\text{RuO}_2$  was much steadier, the XPS results reveal that this OEC was not long-term stable in strong acid either. After measuring the  $J$ - $E$  behavior, the W 4f peaks of the  $\text{RuO}_2/\text{WO}_3$  sample became more intense (Fig. S14b) and the O 1s peak changed such that the  $\text{WO}_3$  component became more prominent relative to the  $\text{RuO}_x$  component (Fig. S14d and Fig. S6b), indicating the gradual dissolution of the  $\text{RuO}_2$  layer.

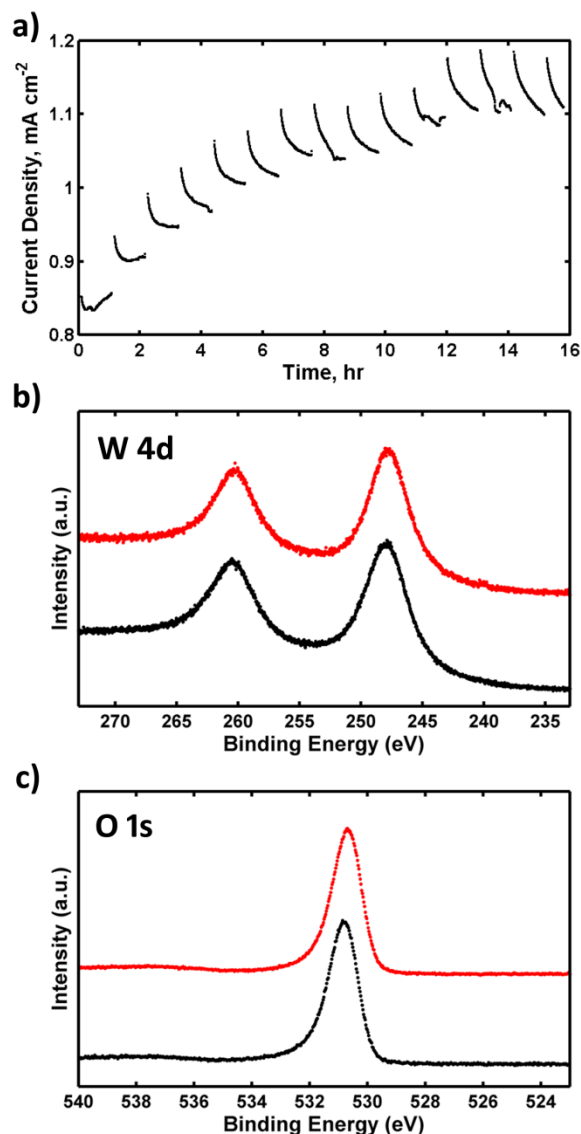

**Figure S15. Stability of WO<sub>3</sub> photoanodes.** (a) Current density vs. time measurement for bare WO<sub>3</sub> in 1 M H<sub>2</sub>SO<sub>4</sub> under 1 sun AM1.5 illumination at 1.2 V vs. RHE with cyclic voltammetric (CV) measurements (30 mV s<sup>-1</sup> scan from 0.4 to 2.0 V vs. RHE and back, 2 scans) made every hour. The discontinuities in the curve are due to the CV measurements. (b, c) XPS data for sputtered WO<sub>3</sub> films (black lines) as-deposited and (red lines) after 12 hr at 1.2 V vs. RHE in 1 M H<sub>2</sub>SO<sub>4</sub> under 1 sun AM1.5 illumination showing high resolution scans of (b) the W 4d region and (c) the O 1s region.

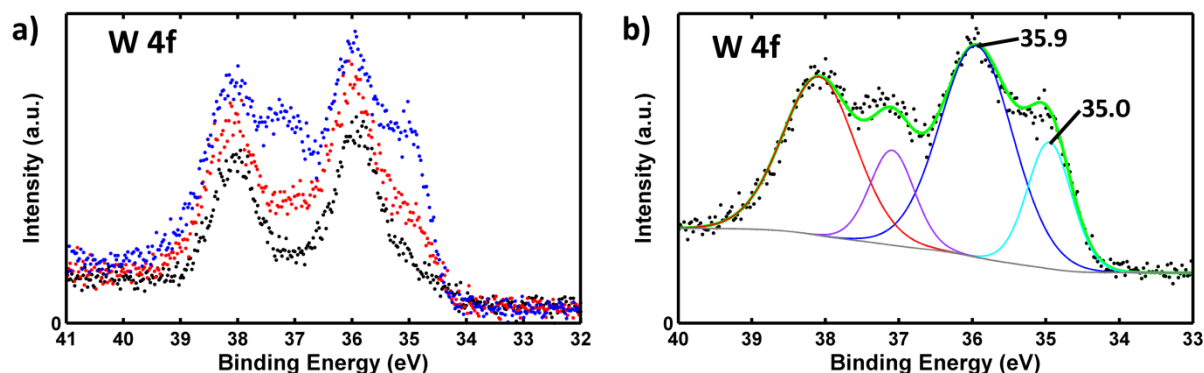

**Figure S16. Stability of sputtered IrO<sub>2</sub> on WO<sub>3</sub>.** XPS spectra of the W 4f region of thin, 0.5 min sputtered IrO<sub>2</sub> on WO<sub>3</sub>, showing (a) the sequential change from (black lines) as-deposited to (red lines) after a  $J-E$  behavior measurement under illumination in 1 M H<sub>2</sub>SO<sub>4</sub>, to (blue lines) after 12 hr at 1.2 V vs. RHE under illumination in 1 M H<sub>2</sub>SO<sub>4</sub>. Also shown are (b) the fitted peaks for the sample after 12 hr at 1.2 V vs. RHE under illumination in 1 M H<sub>2</sub>SO<sub>4</sub>.

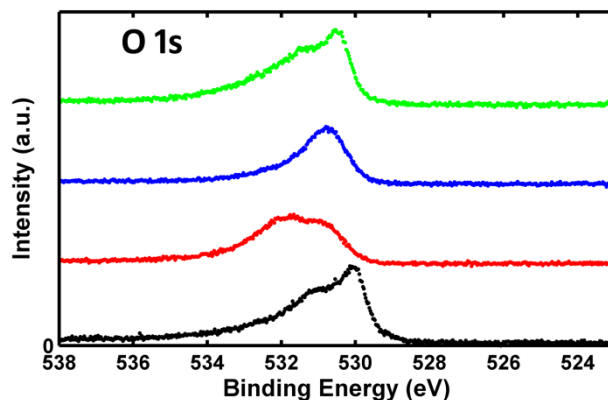

**Figure S17. XPS comparison of different IrO<sub>2</sub> deposition methods.** XPS spectra of the O 1s region of WO<sub>3</sub> with IrO<sub>2</sub> deposited on it by (black line) drop-casting an IrCl<sub>3</sub> solution and then sintering at 400 °C for 1 hr, (red line) electrodeposition, (blue line) electrodeposition followed by a 400 °C anneal for 1 hr, and (green line) sputtering for 0.5 min.

### Electrodeposited IrO<sub>2</sub> on WO<sub>3</sub> Photoanodes.

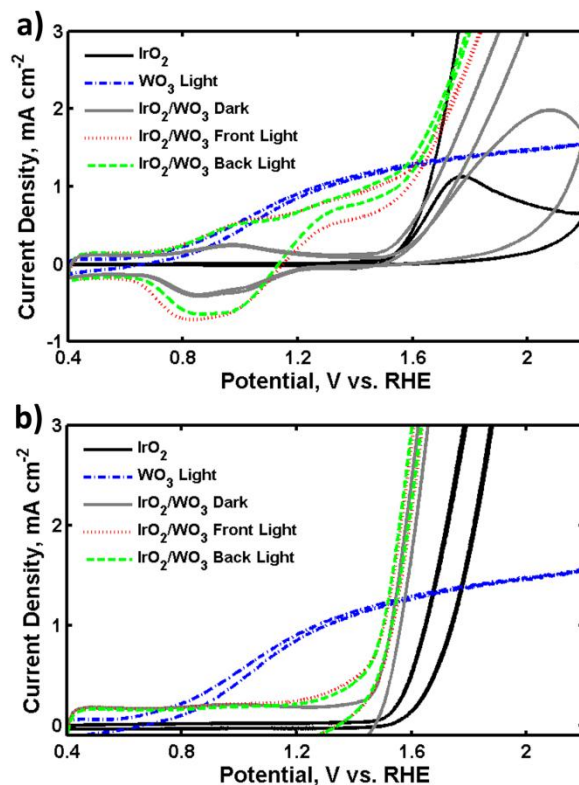

**Figure S18.** *J-E* behavior for electrodeposited IrO<sub>2</sub> on WO<sub>3</sub> by the method of Zhao et al.<sup>1</sup> Photoelectrochemical current-density (*J*) vs. potential (*E*) behavior in 1 M H<sub>2</sub>SO<sub>4</sub> for electrodeposited IrO<sub>2</sub> on WO<sub>3</sub> (a) as-deposited and (b) after a 400 °C anneal for 1 hr. Performance is shown for (green lines) back illumination, (red lines) front illumination, and (gray lines) in the dark, with (blue lines) bare WO<sub>3</sub> under illumination and (black lines) the catalyst by itself on FTO in the dark for reference. Multiple successive scans of IrO<sub>2</sub>/WO<sub>3</sub> in the dark and IrO<sub>2</sub> on FTO are included to demonstrate unstable current in (a) and stable current in (b).

For this IrO<sub>2</sub> electrodeposition procedure, colloidal IrO<sub>x</sub> in a pH 1 mixture was prepared as published.<sup>1</sup> The solution was stored in a refrigerator at 4 °C. IrO<sub>x</sub> films were deposited on FTO/glass and on WO<sub>3</sub> by maintaining the potential at 1.4 V vs. Ag/AgCl until 2.5 C of charge had been passed. In each case, the exposed area of the working electrode for deposition was 1 cm<sup>2</sup>. During deposition, the solution was stirred vigorously and kept in an ice bath.

**Drop-cast, Particulate IrO<sub>2</sub> on WO<sub>3</sub> Photoanodes.** Another method tested for IrO<sub>2</sub> catalyst attachment was the drop-casting of IrO<sub>2</sub> powders directly on the WO<sub>3</sub> surface. IrO<sub>2</sub> powder (99%, Alfa Aesar) was mixed to a 30% w/w IrO<sub>2</sub> suspension in isopropanol and then sonicated for > 3 hr before drop-casting 20 µL of the suspension onto a 1 cm<sup>2</sup> WO<sub>3</sub> electrode area using a micropipette and drying in ambient for ~ 1 hr. Eight sequential coatings of IrO<sub>2</sub> particles were applied. Some particulate IrO<sub>2</sub>/WO<sub>3</sub> electrodes were also annealed at 500 °C for 2 hr in air. Analogous electrodes of IrO<sub>2</sub> particles directly on FTO glass were produced by the same method.

Before any annealing step, particulate IrO<sub>2</sub>/WO<sub>3</sub> photoanodes performed comparably to bare WO<sub>3</sub> under back illumination, but with the photocurrent was reduced by 68% due to catalyst light absorption under front illumination (Table 1). However, these samples displayed no O<sub>2</sub> production and had issues with catalyst loss due to poor adhesion. After annealing to sinter the catalyst particles to the WO<sub>3</sub> surface, most IrO<sub>2</sub> particles remained attached during testing. A reduction in photocurrent was observed after the high temperature anneal, but the faradaic oxygen production efficiency increased from 0 to 43% (Table 1). Considering the relatively low O<sub>2</sub> yield compared to the percentage of photocurrent lost under front illumination, this catalyst attachment method was not pursued further. However, a more sophisticated technique to pattern IrO<sub>2</sub> particles at set dimensions to optimize catalytic activity relative to optical absorption may still hold promise for future studies.

1. Y. X. Zhao, E. A. Hernandez-Pagan, N. M. Vargas-Barbosa, J. L. Dysart and T. E. Mallouk, *J. Phys. Chem. Lett.*, 2011, **2**, 402-406.
